# Supplementary material for: Characterization of Lung Inflammatory Response to Aspergillus fumigatus Spores
Source: MDPI journal article supplement (doi:10.3390/jof9060682), 2023-06-17
Supplement: s1 [file s1]

SUPPLEMENTARY DATA:

**Table S1.** TaqMan® gene expression assays

| Species | Gene                   | Assay ID      | Provider          |
|---------|------------------------|---------------|-------------------|
| Mouse   | <i>HPRT</i>            | Mm03024075_m1 | Life technologies |
| Mouse   | <i>Il1b</i>            | Mm00434228_m1 | Life technologies |
| Mouse   | <i>Il1α</i>            | Mm00439620_m1 | Life technologies |
| Mouse   | <i>Cxcl1</i>           | Mm04207460_m1 | Life technologies |
| Mouse   | <i>Cxcl2</i> (=MIP-2)  | Mm00436450_m1 | Life technologies |
| Mouse   | <i>Tnf</i>             | Mm00443258_m1 | Life technologies |
| Mouse   | <i>Csf2</i> (=GM-CSF)  | Mm01290062_m1 | Life technologies |
| Mouse   | <i>Il6</i>             | Mm00446190_m1 | Life technologies |
| Mouse   | <i>Ccl3</i> (= MIP-1α) | Mm00441258_m1 | Life technologies |
| Mouse   | <i>Ccl4</i> (=MIP-1β)  | Mm00443111_m1 | Life technologies |

**Table S2:** Histopathological findings

| Groups                 | Presence of inflammation and location                                                  | Type of inflammatory infiltrate                            | Inflammation intensity                                                  | Perivascular oedema |
|------------------------|----------------------------------------------------------------------------------------|------------------------------------------------------------|-------------------------------------------------------------------------|---------------------|
| Control group (7 mice) | 14.3% (1/7)<br>Perivascular and bronchiolitis in 1 case (+ subpleural lymphoid tissue) | Lymphocytes and plasma-cells                               | - Mild: 14.3% (1/7)<br>- Moderate: 0%<br>- Severe: 0%                   | Absence             |
| Spore group (7 mice)   | 87.5% (6/7)<br>Bronchiolitis, alveolitis and perivascular in 6 cases                   | Lymphocytes, plasma-cells and rare neutrophils/eosinophils | - Mild: 14.3% (1/6)<br>- Moderate: 71.4% (4/6)<br>- Severe: 14.3% (1/6) | 100% (7/7)          |

**Table S3.** Summary of inflammatory mediators increases in BAL of mice exposed to spores compared to controls, with fold increases and p-values.

| Inflammatory mediators | Fold increase | <i>p-value</i> |
|------------------------|---------------|----------------|
| TNF- $\alpha$          | 1.33          | 0.0087         |
| CXCL-1                 | 2             | 0.0155         |
| IL-1 $\beta$           | 1.5           | 0.0052         |
| IL-6                   | 5             | <0.0001        |
| IL-4                   | 12            | 0.0006         |
| IL-5                   | 14            | 0.0012         |
| IL-9                   | 2             | 0.0261         |
| IL-10                  | 2.33          | 0.0157         |
| IL-12(p70)             | 4             | 0.0004         |
| IL-13                  | 1.77          | 0.0277         |
| IL-17A                 | 2.55          | 0.0023         |
| Eotaxin                | 5             | 0.0061         |
| G-CSF                  | 4.7           | 0.0041         |
| IFN- $\gamma$          | 2             | 0.0495         |
| MCP-1                  | 1.5           | 0.0064         |
| MIP-1 $\alpha$         | 6.6           | 0.0070         |
| MIP-1 $\beta$          | 36            | 0.0006         |

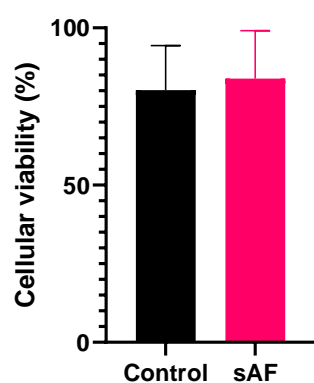

Figure S1: Percentage of cellular viability on co-cultured cells. No statistical difference between control cells and cells challenged with AFsp ( $p=0.7326$ ).

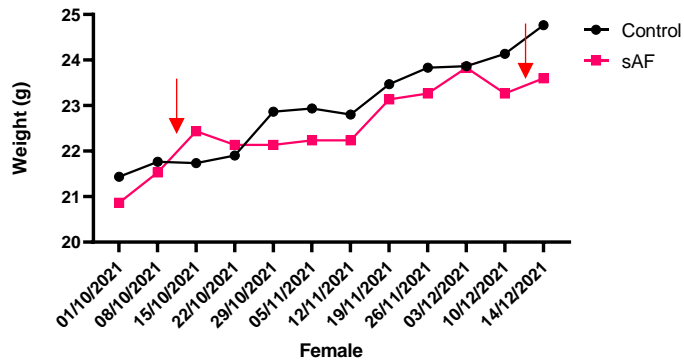

**A**

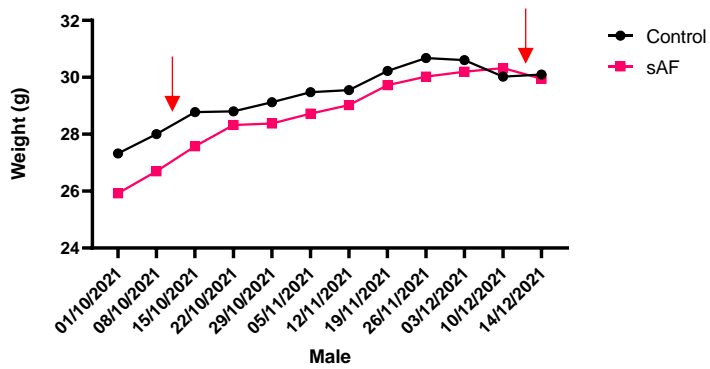

**B**

Figure S2: Weight of female (A) and male (B) mice after exposure to *Aspergillus fumigatus* spores. No difference between control and challenged mice in body weight gain or lose. Times where instillations were made are indicated with red arrows.

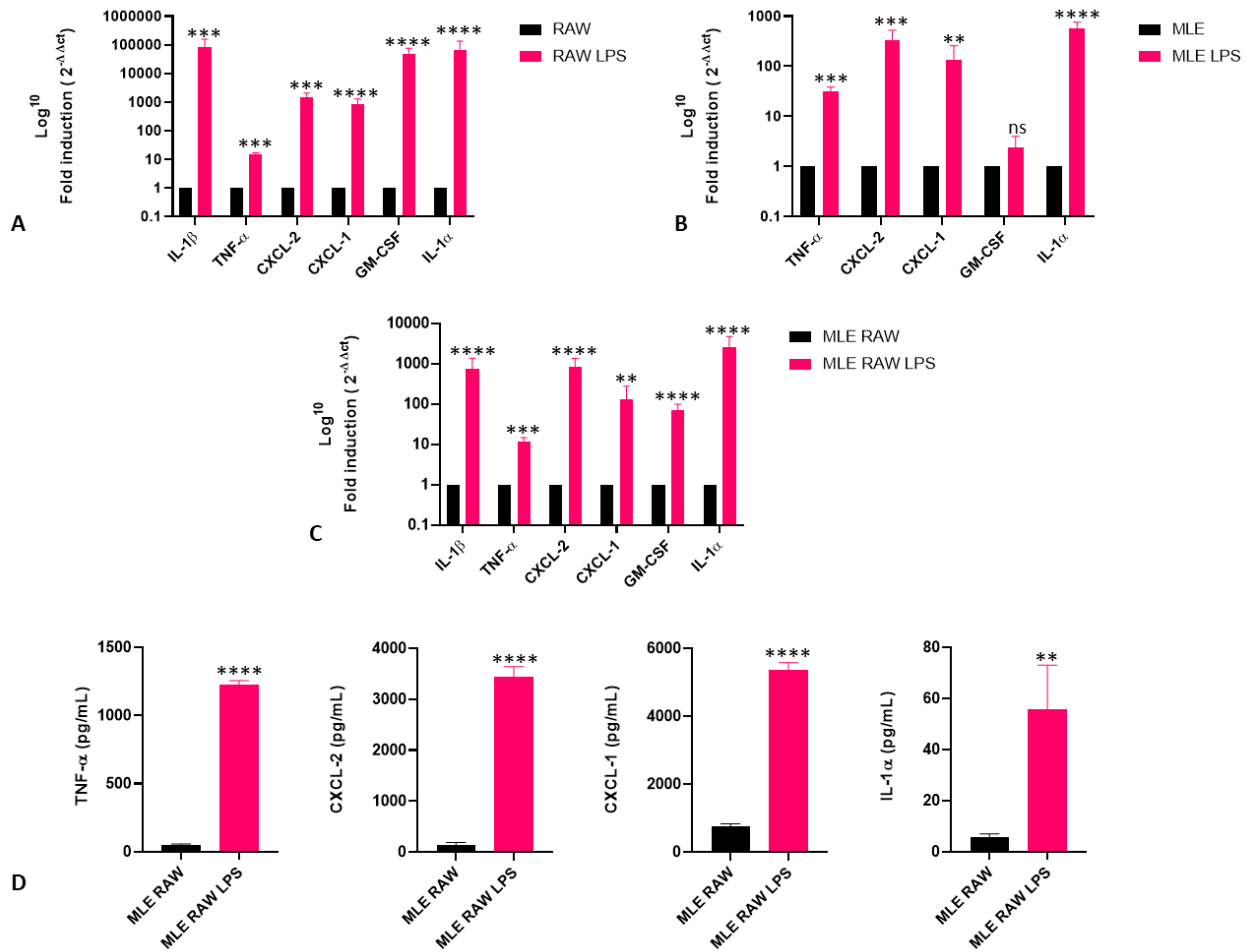

Figure S3: Gene expression and secretion of defined inflammatory mediators after a 4-hour exposure of RAW 264.7, MLE-15 and co-cultured MLE RAW cells to LPS at 1µg/mL (A) Quantification of the gene expression of inflammatory markers in RAW 264.7 cells by RT-qPCR. (B) Quantification of the gene expression of inflammatory markers in MLE-15 cells by RT-qPCR. (C) Quantification of the gene expression of inflammatory markers in co-cultured MLE-15/RAW 264.7 cells by RT-qPCR. (D) Cytokine secretion in the supernatants. Data are represented by mean with SD. (\*\*\*\*  $p<0.0001$ , \*\*\* $p<0.001$ , \*\* $p<0.01$  versus untreated cells,  $n=3$  for monocultures and  $n=4$  for co-culture)
